# Supplementary material for: Induction of G2/M Cell Cycle Arrest and Apoptosis by Genistein in Human Bladder Cancer T24 Cells through Inhibition of the ROS-Dependent PI3k/Akt Signal Transduction Pathway
Source: Antioxidants (Basel). 2019 Aug 21;8(9):327. doi: 10.3390/antiox8090327 (PMC6769882; doi:10.3390/antiox8090327)
Supplement: Supplementary file 1 [file antioxidants-08-00327-s001.pdf]

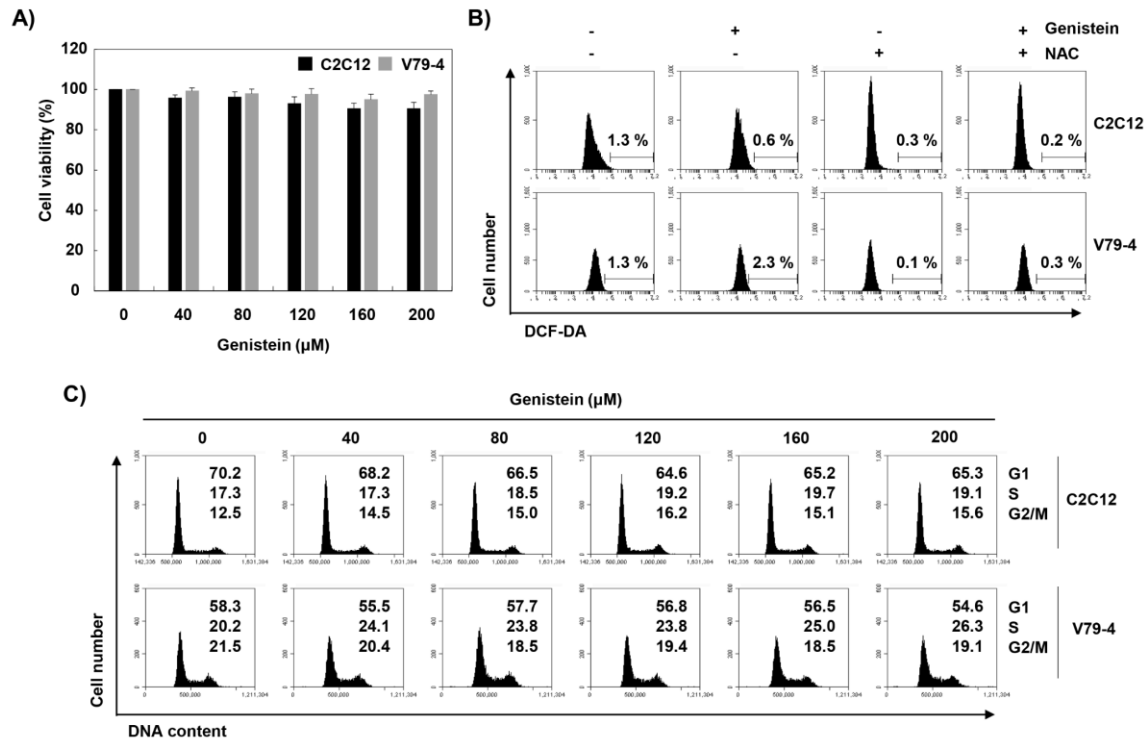

**Figure 1. Effect of genistein in C2C12 cells and V79-4 cells.**(A) Cells were treated with various concentration of genistein for 48 h. The cell viability was assessed by MTT assay. Each bar represents the mean  $\pm$  SD of three independent experiments. (B) The cells were pre-treated with or without 10 mM N-acetyl-L-cysteine (NAC) for 1 h, before 160  $\mu$ M genistein treatment for 1 h. The medium was discarded, and the cells were incubated for 20 min with new culture medium containing 5,6-carboxy-2',7'-dichlorodihydrofluorescein diacetate (DCF-DA). ROS generation was measured by flow cytometry. (C) Representative profiles. Quantification of the cell population (in percent) in different cell cycle phases of viable cells was shown.

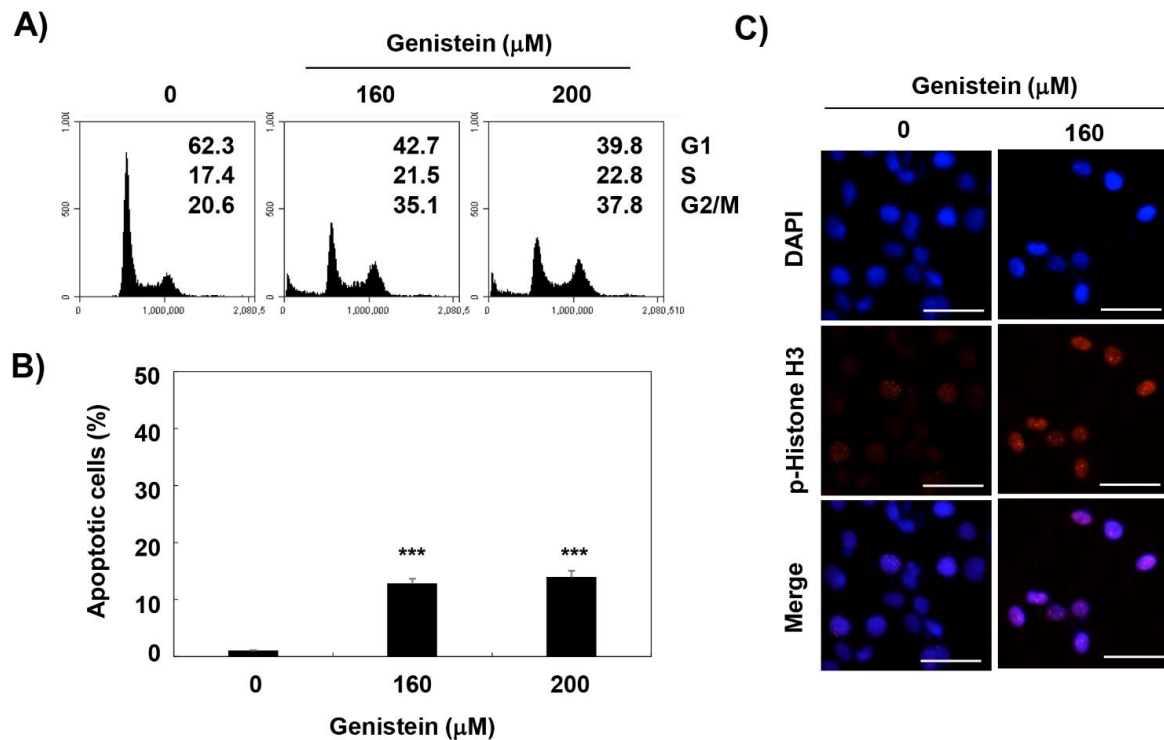

**Figure 2. Effect of genistein on apoptosis and cell cycle arrest in T24 cells for 24 h.** (A) Representative cell cycle profiles. Quantification of the cell population (in percent) in different cell cycle phases of viable cells was shown. (B) The cells were stained with annexin V-fluorescein isothiocyanate (FITC) and PI for flow cytometry analysis. The percentages of apoptotic cells were determined by expressing the numbers of Annexin V+ cells as percentages of all the present cells. The results are presented as the mean  $\pm$  SD of three independent experiments (\*\* $p < 0.0001$  compared to control). (C) Cells were immunostained with phospho-Histone H3 antibody (red) and DAPI (nuclear stain; blue), then the cells were observed under a fluorescence microscope (scale bar; 50  $\mu\text{m}$ ).
